# Supplementary material for: Cardiac circRNAs arise mainly from constitutive exons rather than alternatively spliced exons
Source: PubMed Central journal article supplement — RNA. 2018 Jun;24(6):815–27. doi: 10.1261/rna.064394.117 (PMC5959250; doi:10.1261/rna.064394.117), 2018-06

A

## UCSC Genome Browser on Mouse July 2007 (NCBI37/mm9) Assembly

move &lt;&lt;&lt; &lt;&lt; &lt; &gt; &gt;&gt; &gt;&gt;&gt; zoom in 1.5x 3x 10x base zoom out 1.5x 3x 10x 100x

chr7:71,489,206-71,522,955 33,750 bp. enter position, gene symbol or search terms

go

chr7 (qC) 7qA1 A2 7qA3 7qB1 B2 7qB3 7qB4 7qB5 7qC 7qD1 D2 7qD3 7qE1 E2 7qE3 7qF1 qF2 7qF3 E4 qF5

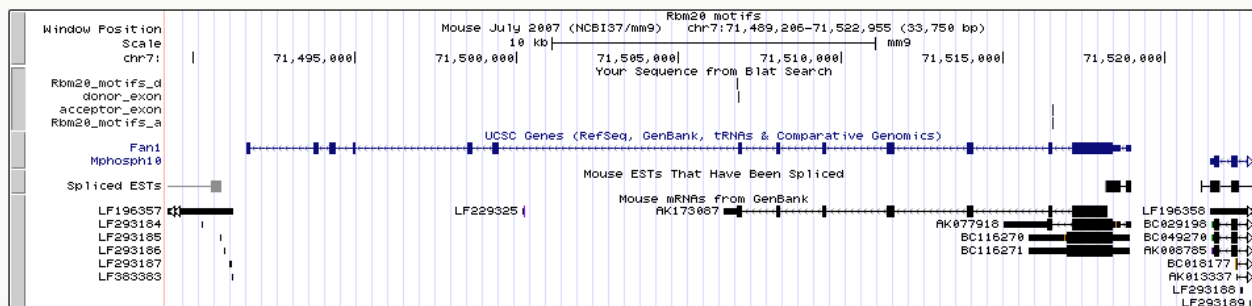

B

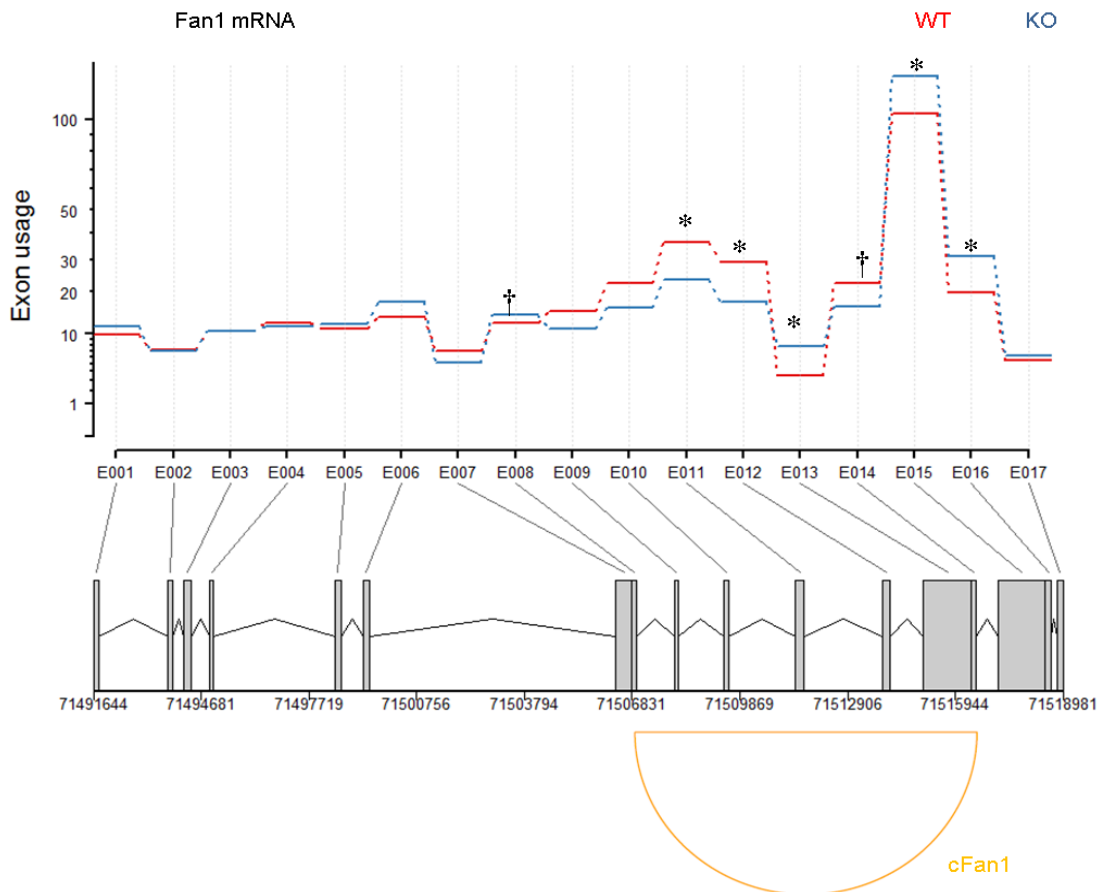

Supplement: supp_064394.117_Supplemental_Fig_S5.pdf [file supp_064394.117_Supplemental_Fig_S5.pdf]
