# Supplementary figures and images for: Cardiac circRNAs arise mainly from constitutive exons rather than alternatively spliced exons
Source: PubMed Central journal article supplement — RNA. 2018 Jun;24(6):815–27. doi: 10.1261/rna.064394.117 (PMC5959250; doi:10.1261/rna.064394.117), 2018-06

A

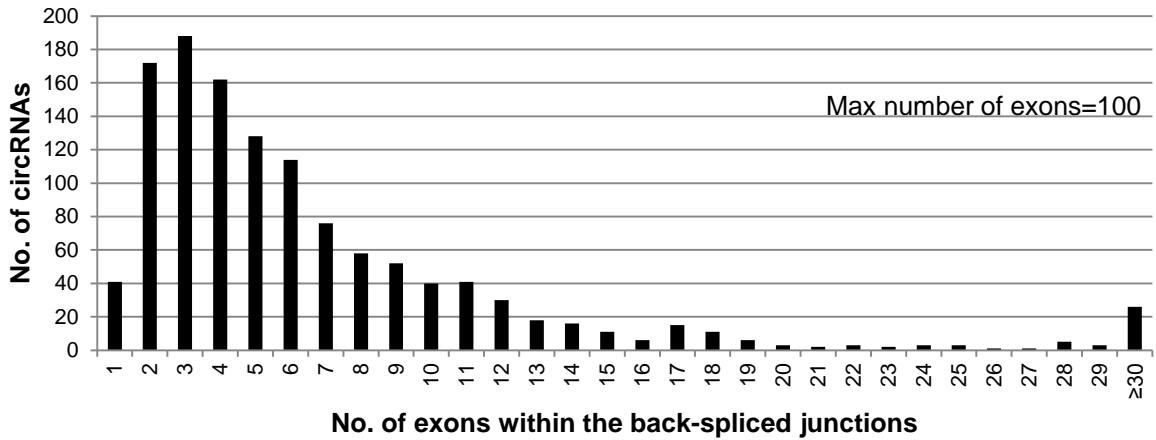

B

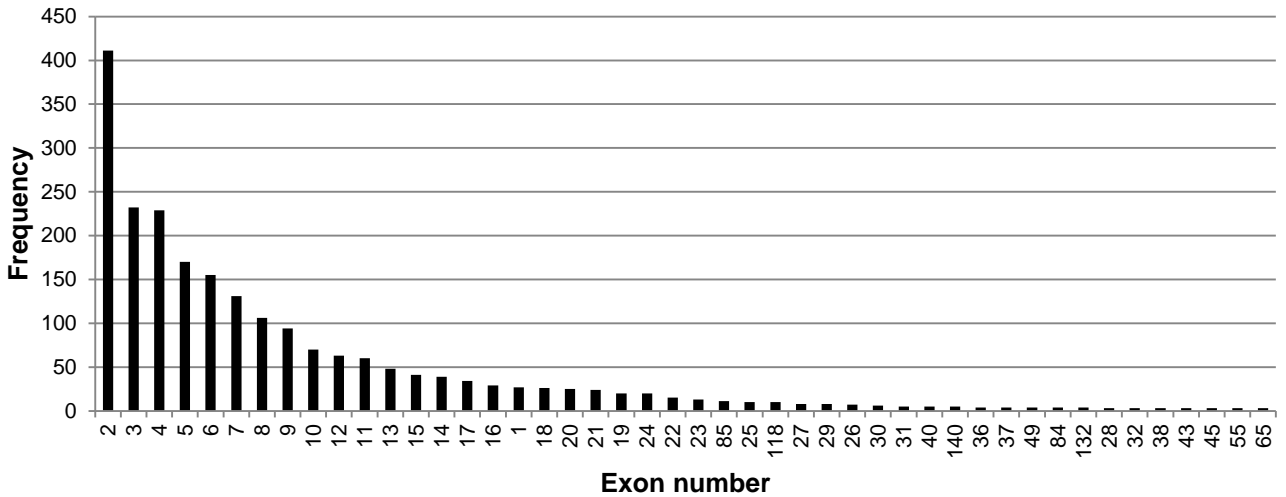

C

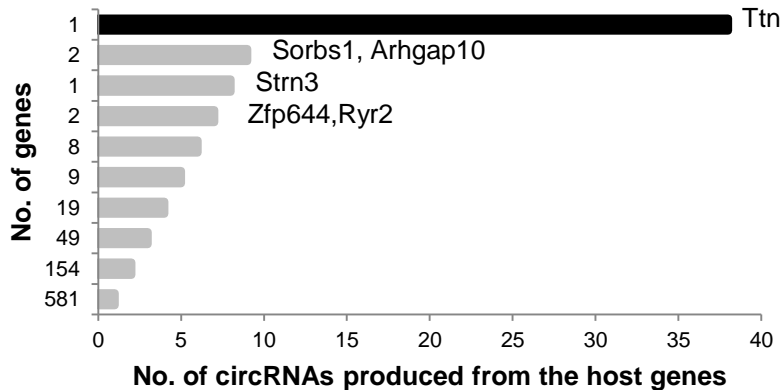

Supplement: supp_064394.117_Supplemental_Fig_S1.pdf [file supp_064394.117_Supplemental_Fig_S1.pdf]

A

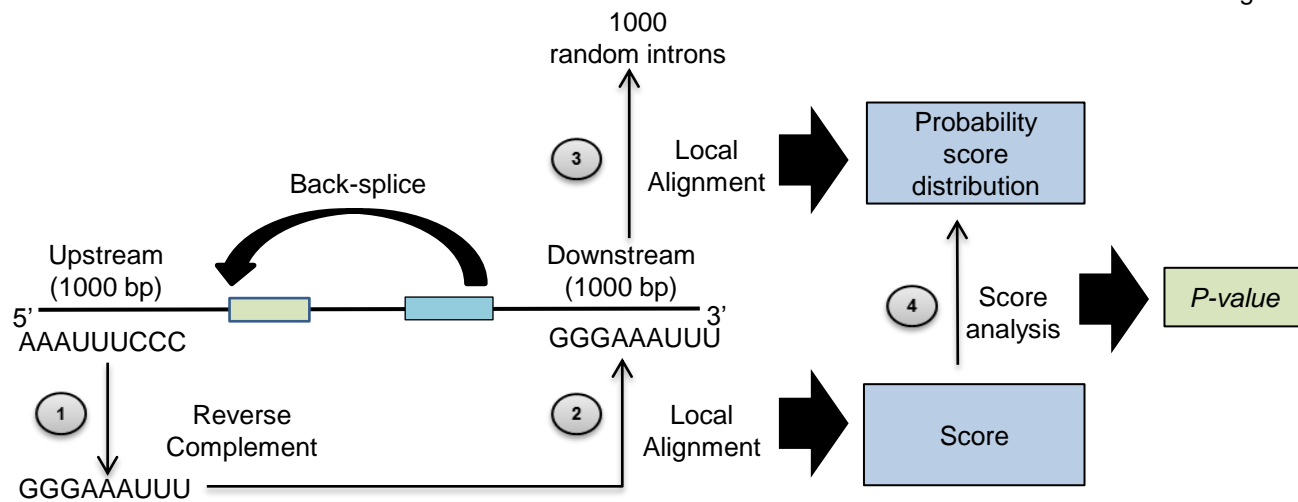

B

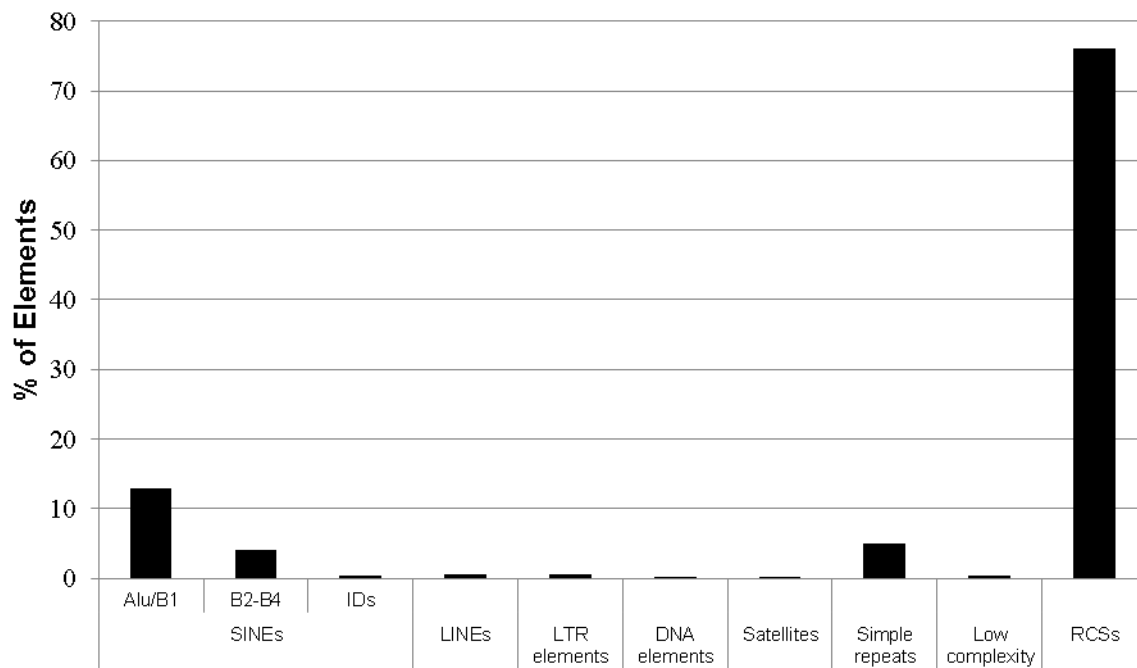

Supplement: supp_064394.117_Supplemental_Fig_S2.pdf [file supp_064394.117_Supplemental_Fig_S2.pdf]

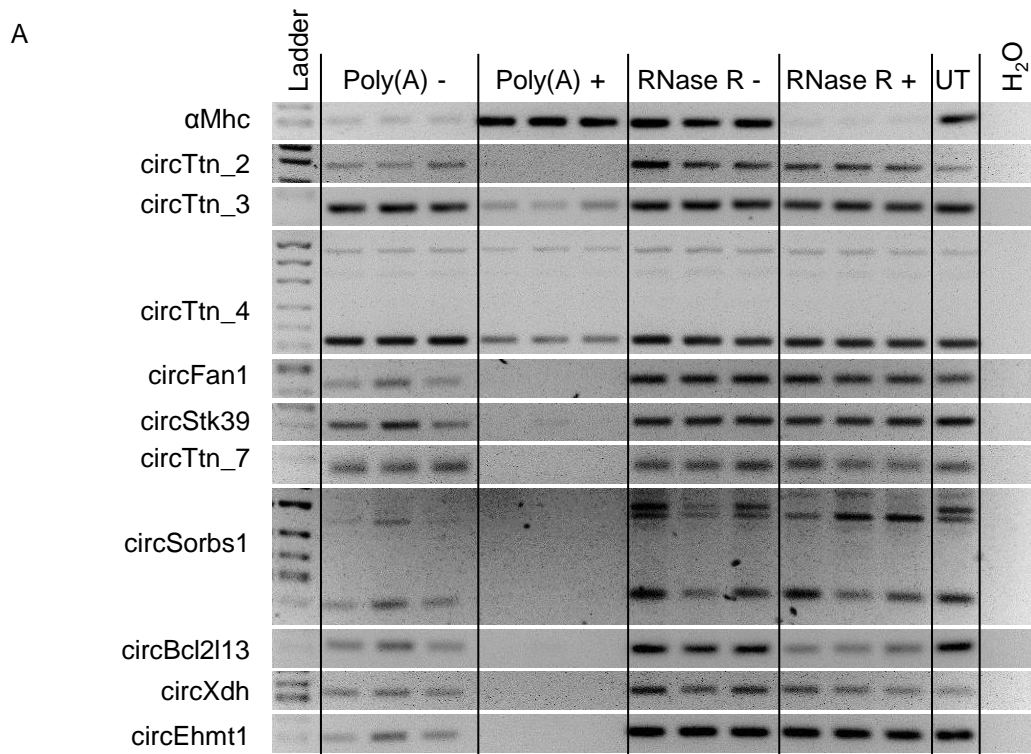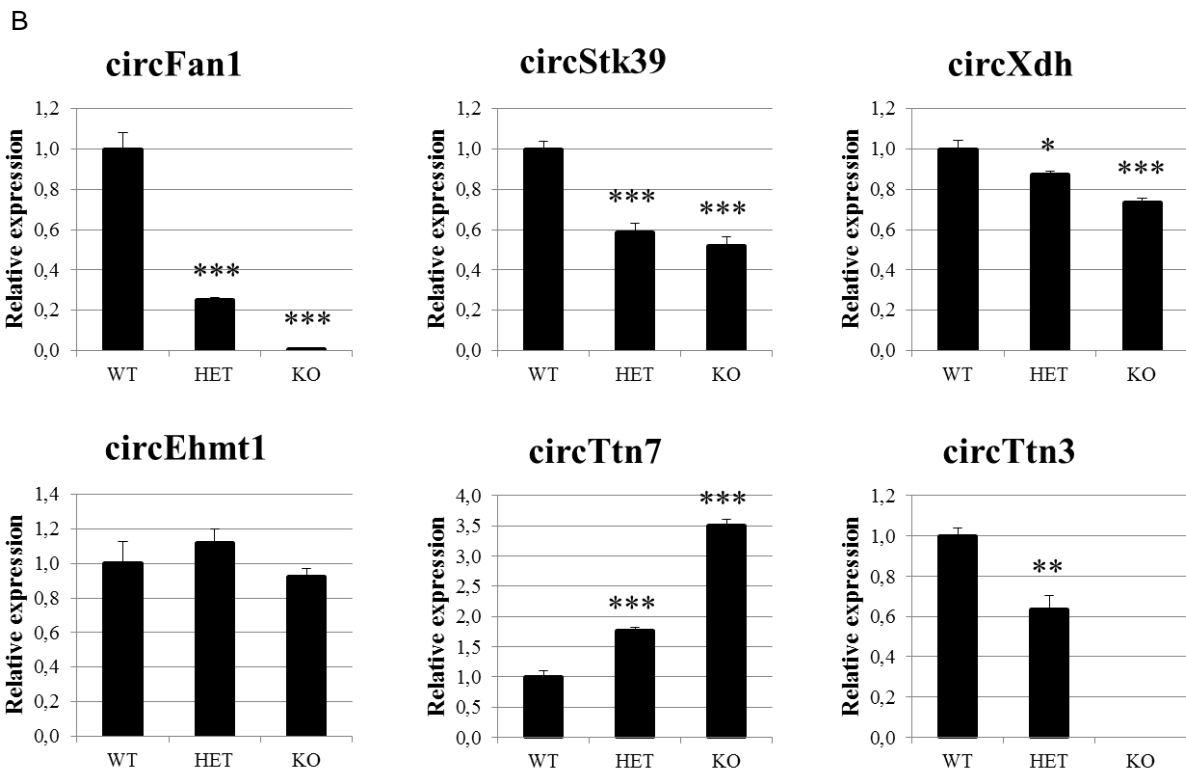

Supplement: supp_064394.117_Supplemental_Fig_S3.pdf [file supp_064394.117_Supplemental_Fig_S3.pdf]

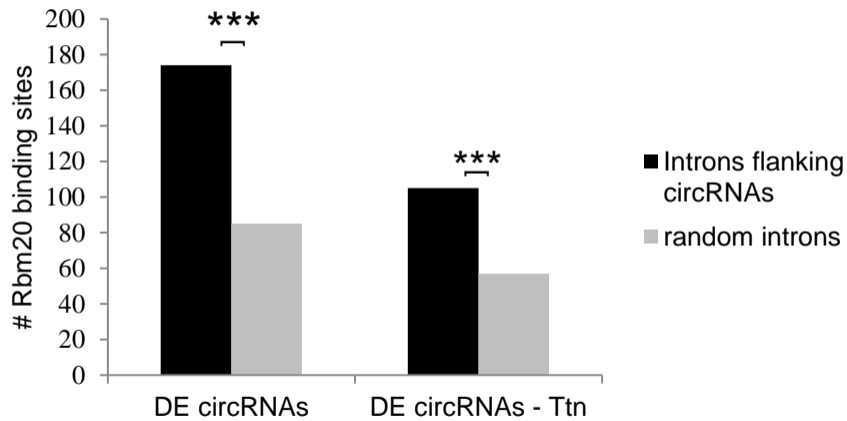

Supplement: supp_064394.117_Supplemental_Fig_S4.pdf [file supp_064394.117_Supplemental_Fig_S4.pdf]

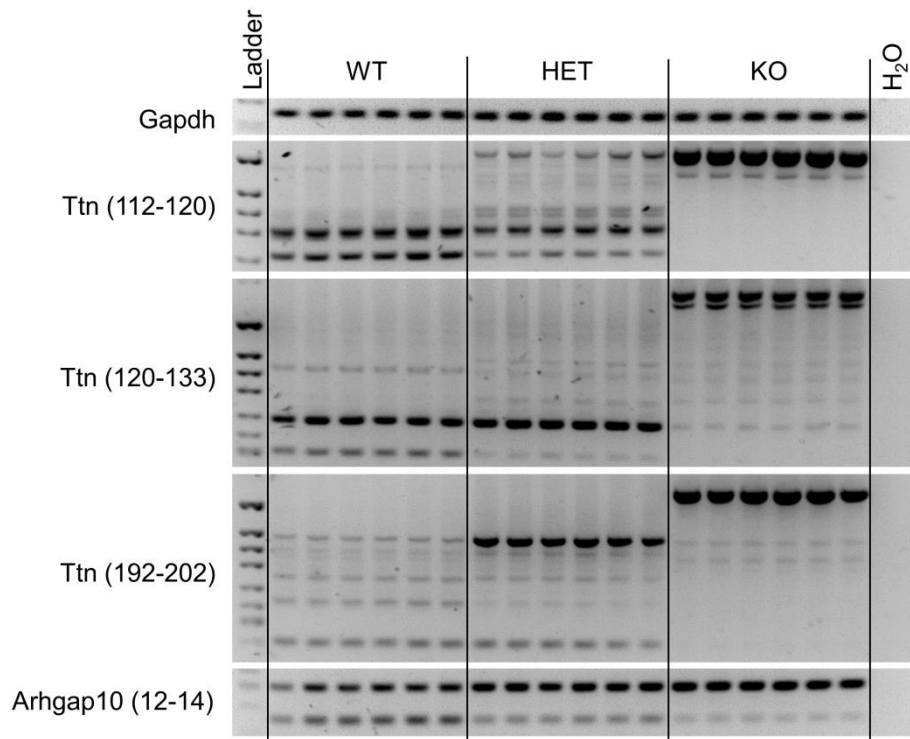

Supplement: supp_064394.117_Supplemental_Fig_S6.pdf [file supp_064394.117_Supplemental_Fig_S6.pdf]

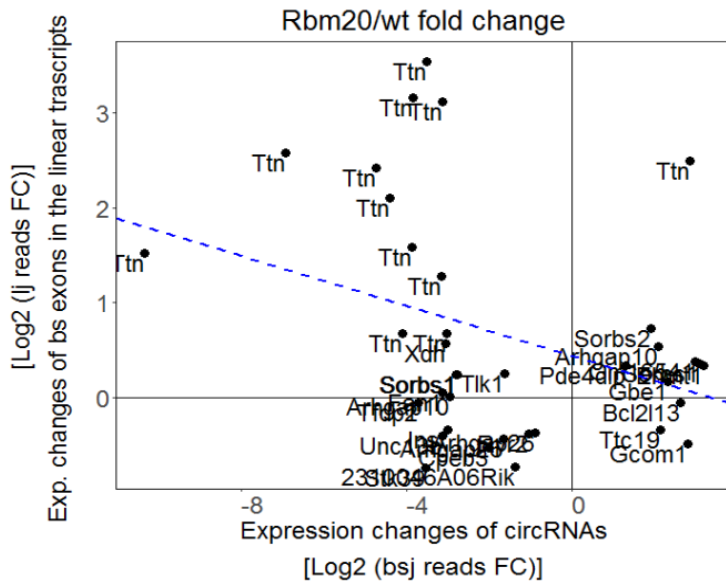

Supplement: supp_064394.117_Supplemental_Fig_S7.pdf [file supp_064394.117_Supplemental_Fig_S7.pdf]

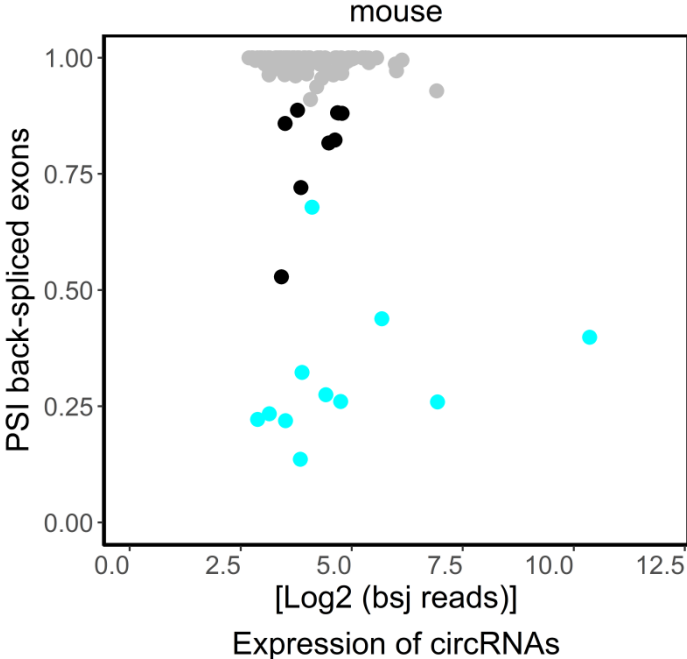

Supplement: supp_064394.117_Supplemental_Fig_S8.pdf [file supp_064394.117_Supplemental_Fig_S8.pdf]
